# Supplementary material
Source: PubMed Central journal article supplement (PMC7111424)

Fig. S1.

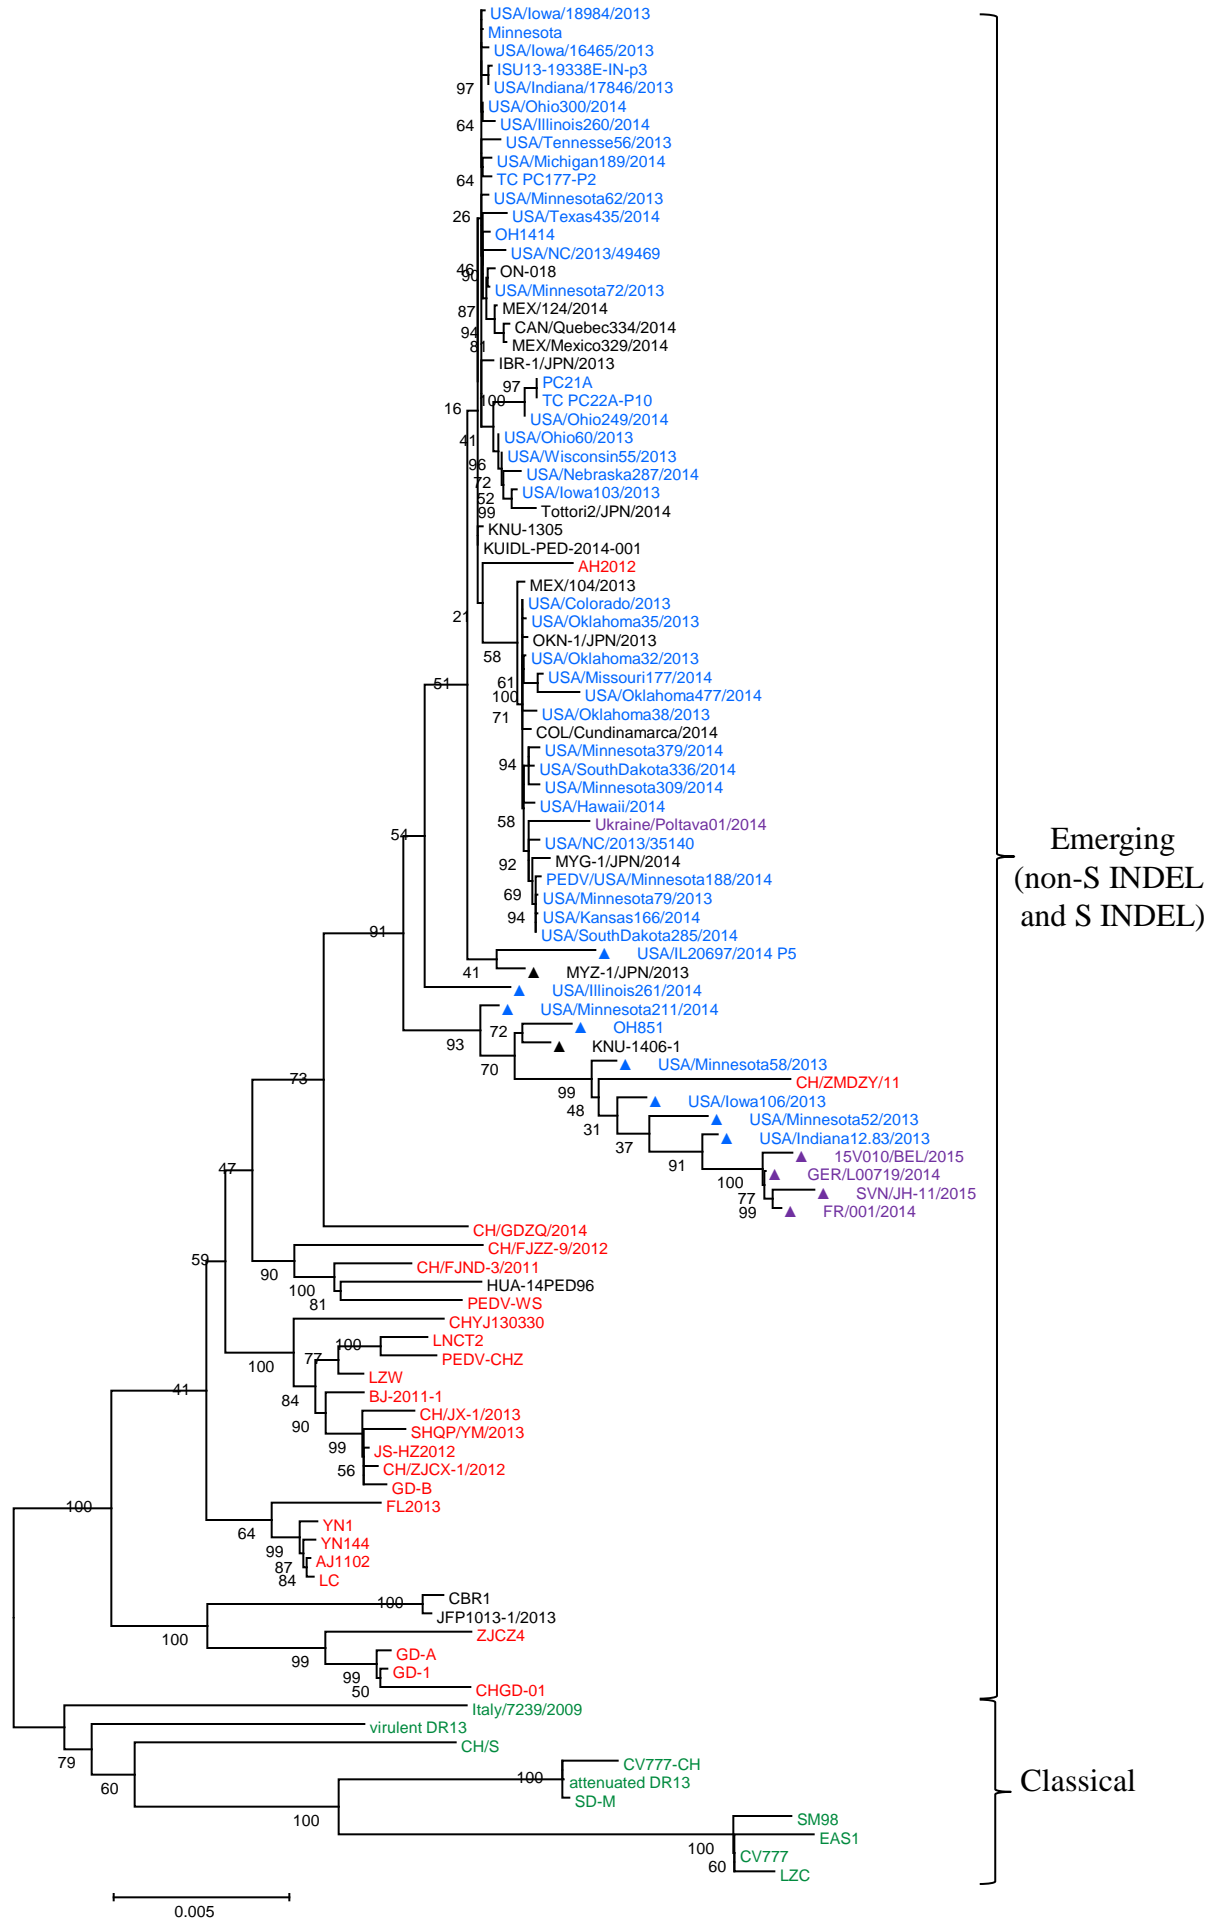

Fig. S2.

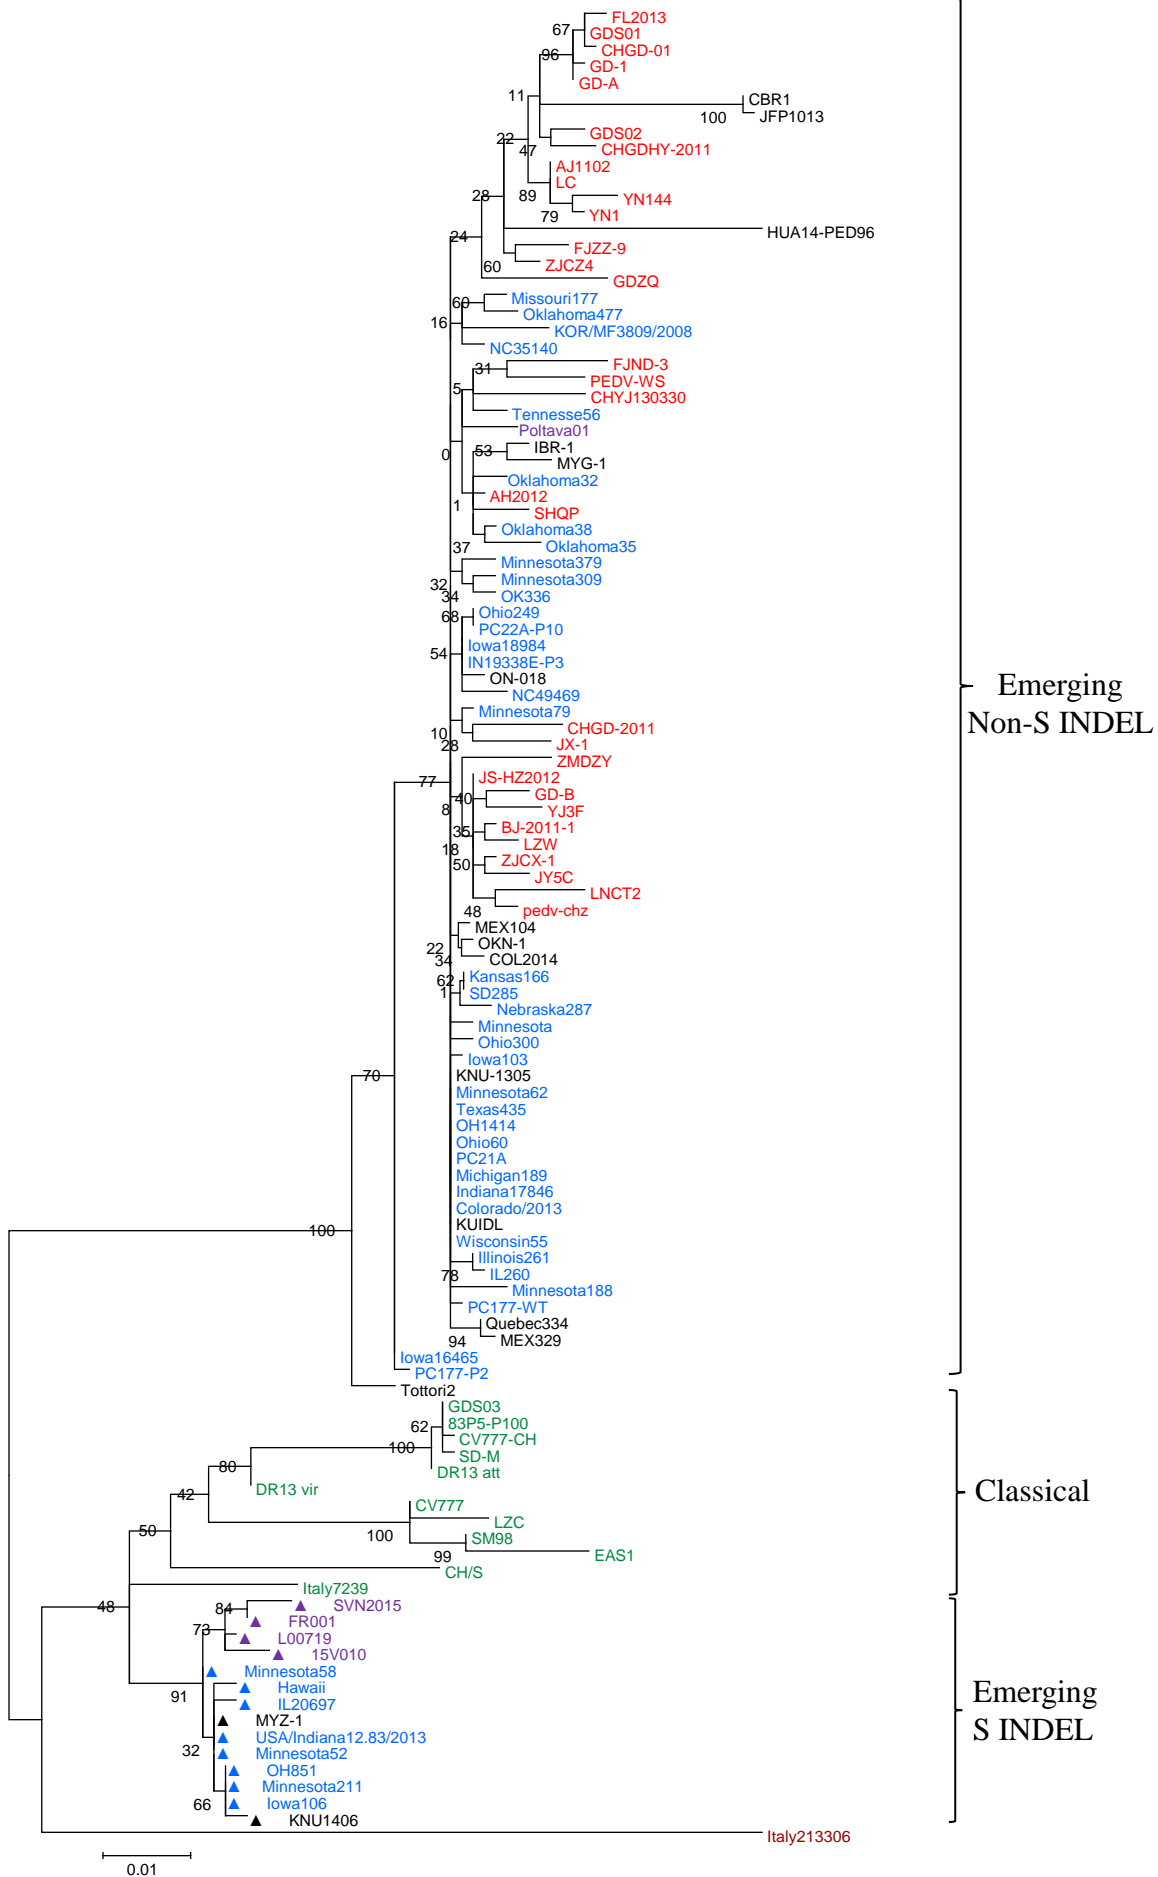

Fig. S3.

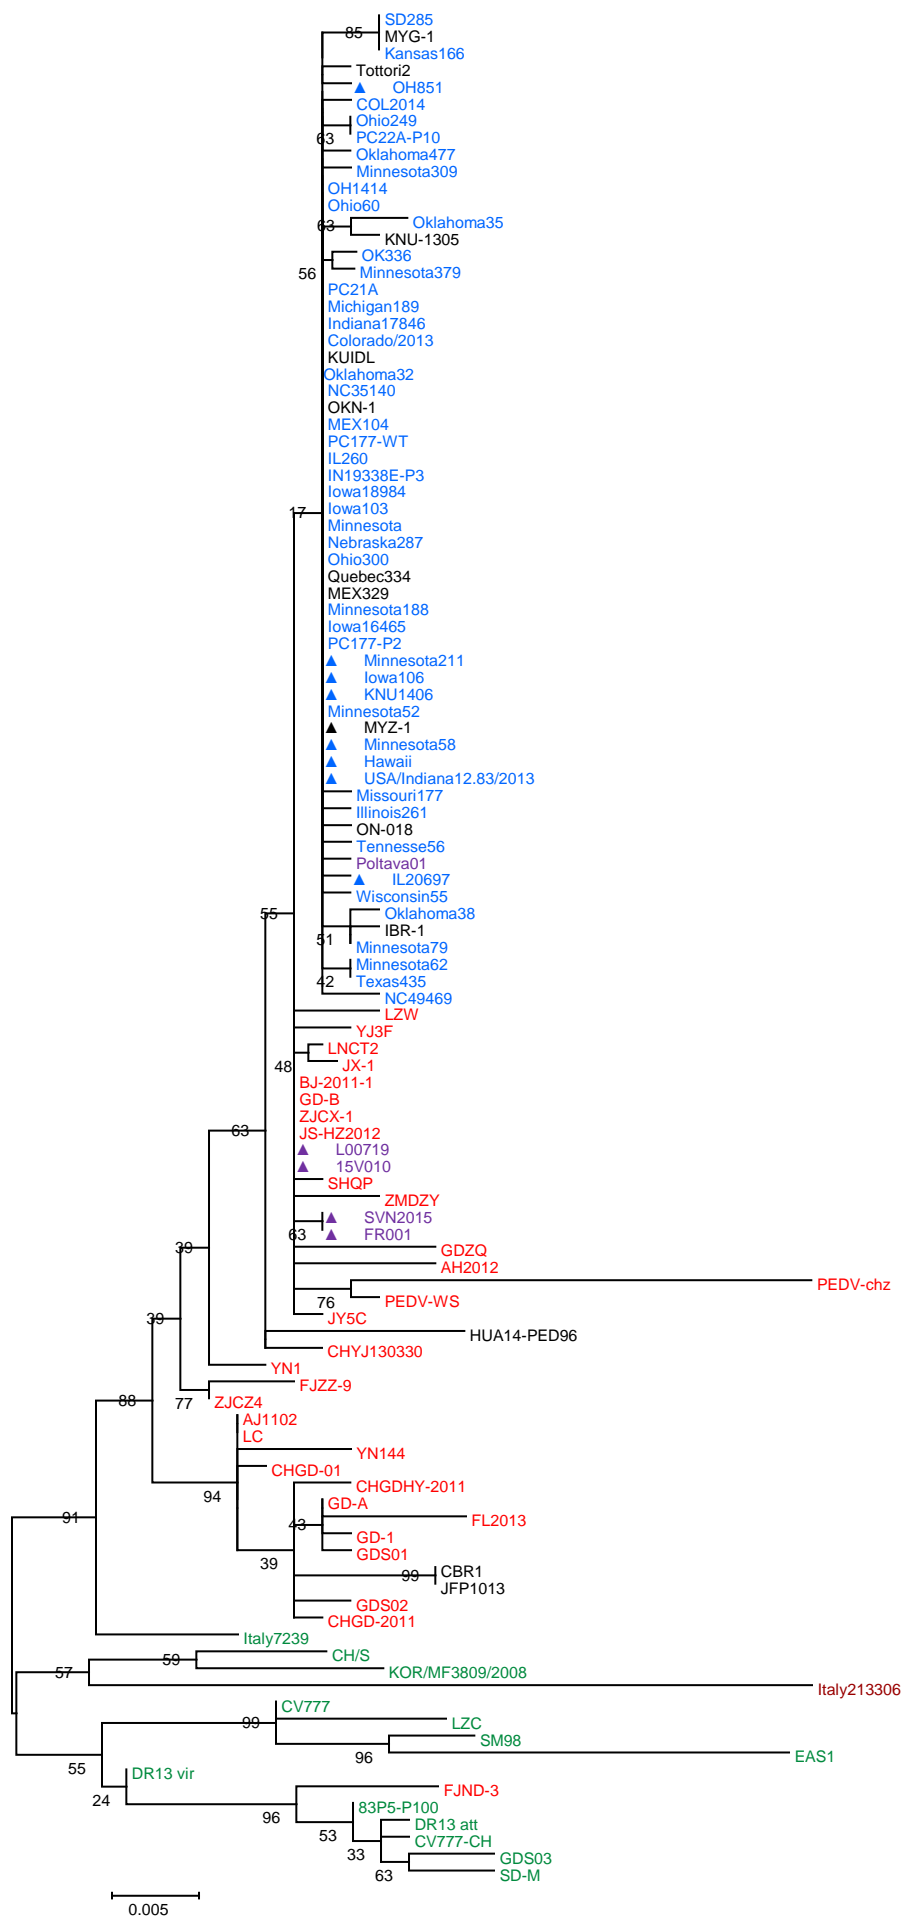

Fig. S4.

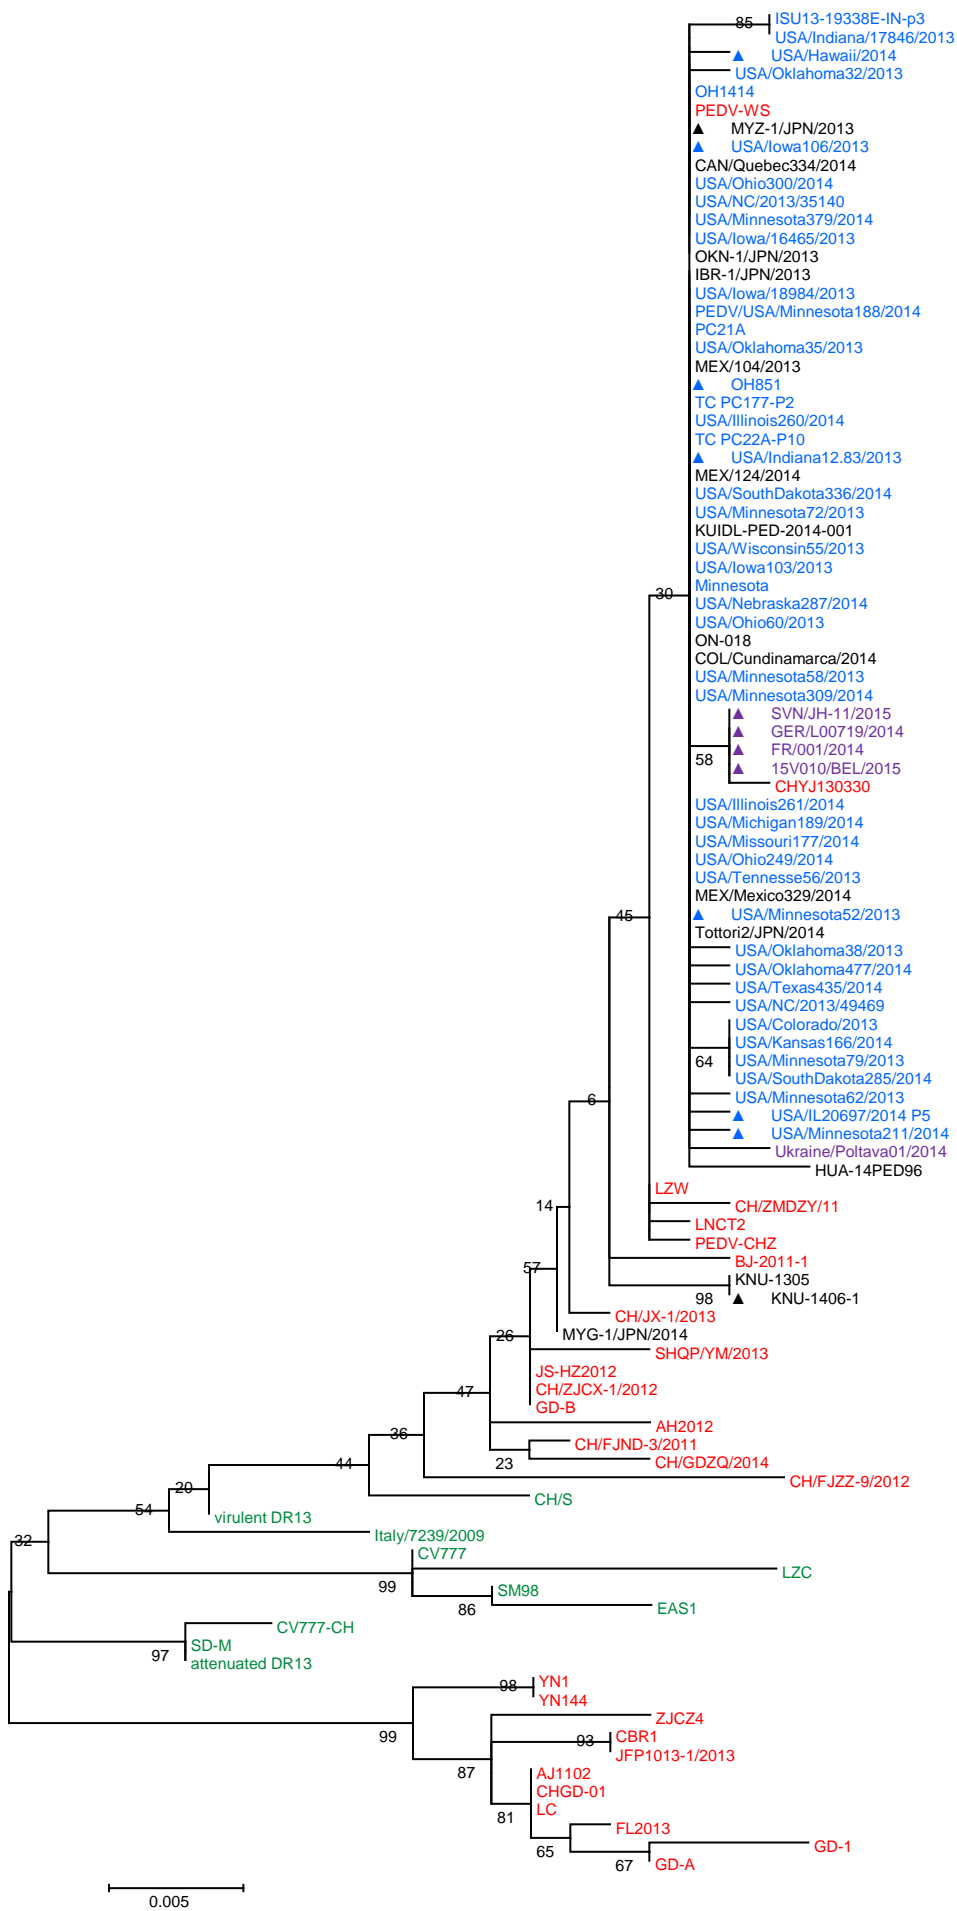

Fig. S5.

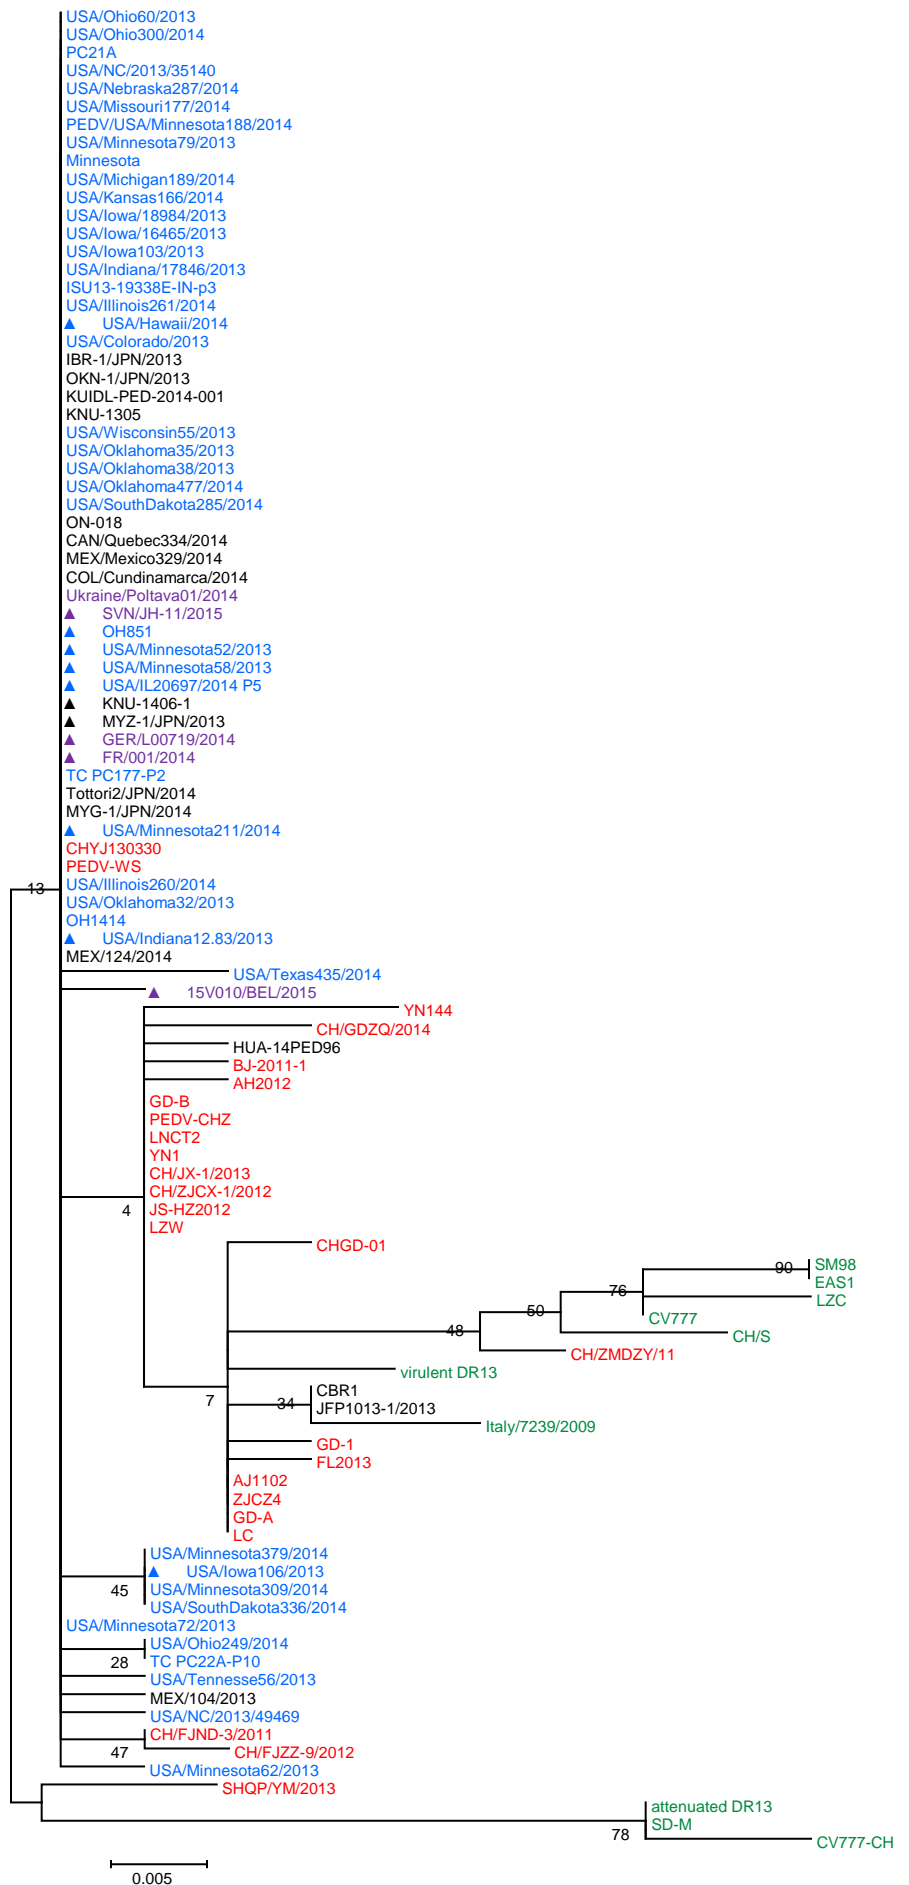

Fig. S6.

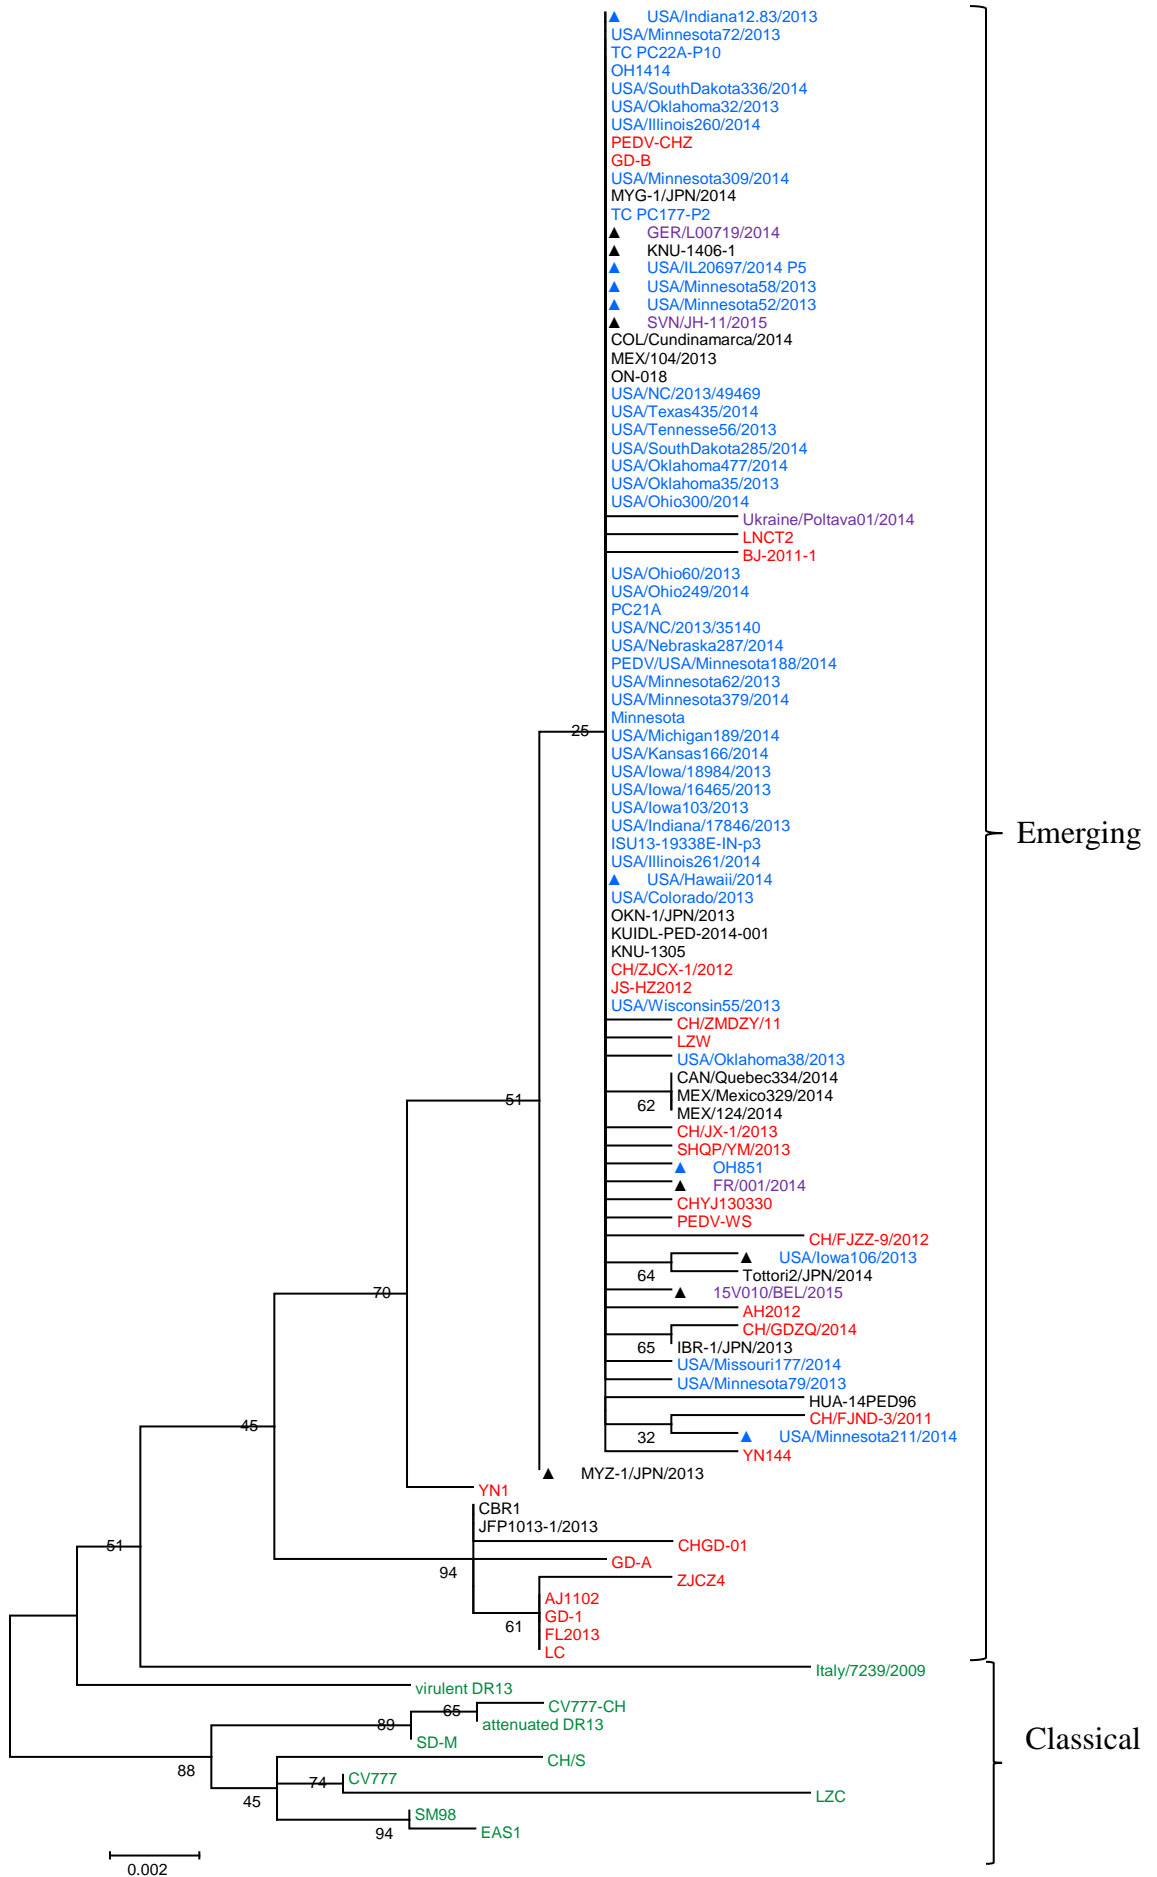

Fig. S7.

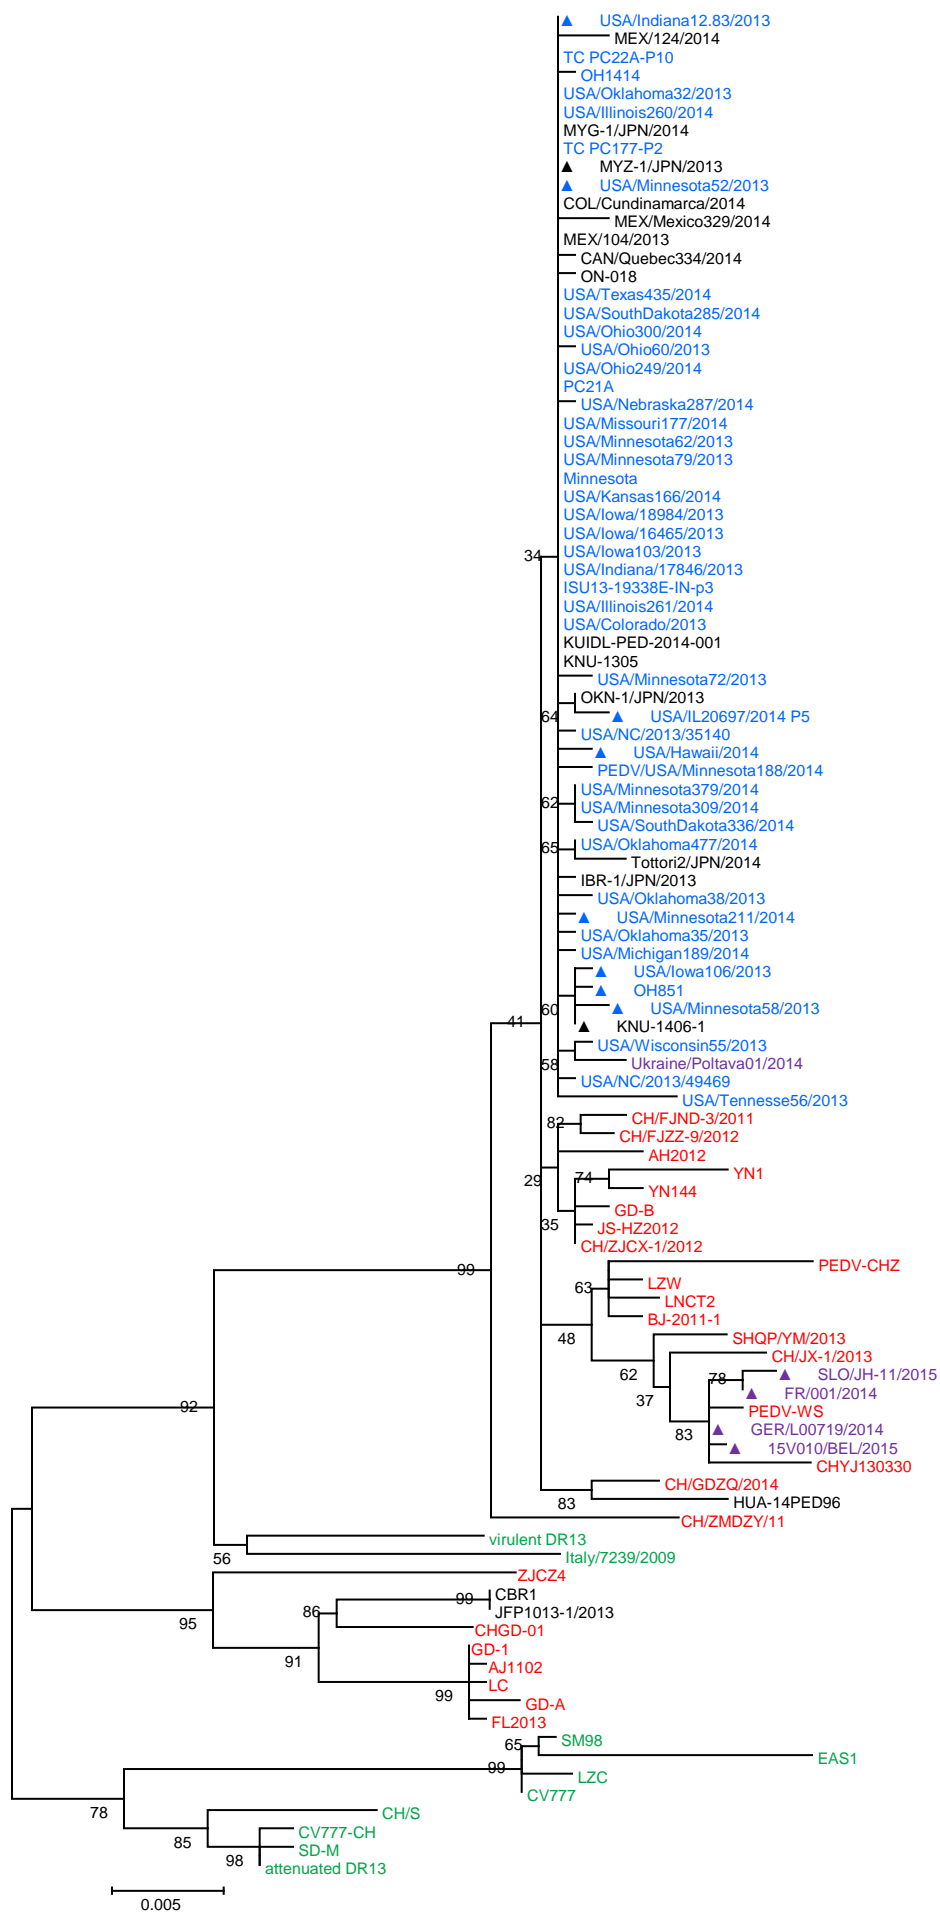





Fig. S9.

| Species/Abbrv            |   |   |     | * | *** |   |   | * | ***** | * | * | * | ***** | ***** | ***** | ***** | * | ***** | ***** | * | ***** | * | ***** | ***** | * |   |   |   |   |   |   |   |   |   |   |   |   |   |   |   |   |   |   |   |   |   |   |   |   |   |   |   |   |   |   |   |   |   |   |   |   |   |   |   |   |     |     |   |   |   |   |   |   |   |   |   |   |   |   |   |   |   |   |   |   |   |   |    |   |   |   |
|--------------------------|---|---|-----|---|-----|---|---|---|-------|---|---|---|-------|-------|-------|-------|---|-------|-------|---|-------|---|-------|-------|---|---|---|---|---|---|---|---|---|---|---|---|---|---|---|---|---|---|---|---|---|---|---|---|---|---|---|---|---|---|---|---|---|---|---|---|---|---|---|---|---|-----|-----|---|---|---|---|---|---|---|---|---|---|---|---|---|---|---|---|---|---|---|---|----|---|---|---|
| 1. AH2012                | G | E | N   | G | V   | N | S | T | W     | Y | C | A | G     | H     | P     | A     | S | G     | V     | H | G     | I | F     | V     | S | I | I | G | G | H | G | F | E | I | G | I | S | E | F | D | D | S | G | Y | L | Y | L | H | A | N | G | T | N | A | A | L | R | I | C | F | F | S | I | K | L | G   | P   | A | N | D | V | T | G | R | N | C | L | F | N | K | A | I | F | A | H | M | E | -- | H | V | V |
| 2. ZMDZY                 | G | E | N   | G | V   | N | S | T | W     | Y | C | A | G     | H     | P     | A     | S | G     | V     | H | G     | I | F     | V     | S | I | I | G | G | H | G | F | E | I | G | I | S | E | F | D | D | S | G | Y | L | Y | L | H | A | N | G | T | N | A | A | L | R | I | C | F | F | S | I | K | L | G   | P   | A | N | D | V | T | G | R | N | C | L | F | N | K | A | I | F | A | H | M | E | -- | H | V | V |
| 3. GD-1                  | G | E | N   | G | V   | N | S | T | W     | Y | C | A | G     | H     | P     | A     | S | G     | V     | H | G     | I | F     | V     | S | I | I | G | G | H | G | F | E | I | G | I | S | E | F | D | D | S | G | Y | L | Y | L | H | A | N | G | T | N | A | A | L | R | I | C | F | F | S | I | K | L | G   | P   | A | N | D | V | T | G | R | N | C | L | F | N | K | A | I | F | A | H | M | E | -- | H | V | V |
| 4. YN1                   | G | E | N   | G | V   | N | S | T | W     | Y | C | A | G     | H     | P     | A     | S | G     | V     | H | G     | I | F     | V     | S | I | I | G | G | H | G | F | E | I | G | I | S | E | F | D | D | S | G | Y | L | Y | L | H | A | N | G | T | N | A | A | L | R | I | C | F | F | S | I | K | L | G   | P   | A | N | D | V | T | G | R | N | C | L | F | N | K | A | I | F | A | H | M | E | -- | H | V | V |
| 5. Colorado/2013         | G | E | N   | G | V   | N | S | T | W     | Y | C | A | G     | H     | P     | A     | S | G     | V     | H | G     | I | F     | V     | S | I | I | G | G | H | G | F | E | I | G | I | S | E | F | D | D | S | G | Y | L | Y | L | H | A | N | G | T | N | A | A | L | R | I | C | F | F | S | I | K | L | G   | P   | A | N | D | V | T | G | R | N | C | L | F | N | K | A | I | F | A | H | M | E | -- | H | V | V |
| 6. PC21A                 | G | E | N   | G | V   | N | S | T | W     | Y | C | A | G     | H     | P     | A     | S | G     | V     | H | G     | I | F     | V     | S | I | I | G | G | H | G | F | E | I | G | I | S | E | F | D | D | S | G | Y | L | Y | L | H | A | N | G | T | N | A | A | L | R | I | C | F | F | S | I | K | L | G   | P   | A | N | D | V | T | G | R | N | C | L | F | N | K | A | I | F | A | H | M | E | -- | H | V | V |
| 7. PC22A-P10             | G | E | N   | G | V   | N | S | T | W     | Y | C | A | G     | H     | P     | A     | S | G     | V     | H | G     | I | F     | V     | S | I | I | G | G | H | G | F | E | I | G | I | S | E | F | D | D | S | G | Y | L | Y | L | H | A | N | G | T | N | A | A | L | R | I | C | F | F | S | I | K | L | G   | P   | A | N | D | V | T | G | R | N | C | L | F | N | K | A | I | F | A | H | M | E | -- | H | V | V |
| 8. OH851                 | M | S | --- | S | S   | W | Y | C | G     | G | L | E | A     | S     | G     | V     | H | G     | I     | F | L     | S | Y     | I     | D | A | G | G | F | E | I | G | I | S | E | F | D | D | S | G | Y | L | Y | L | H | A | N | G | H | N | A | I | A | L | R | I | C | F | F | D | K | L | G | P | V | --- | D   | V | T | G | R | N | C | L | F | N | K | A | I | F | A | Y | M | D | G | K | I | V  | V |   |   |
| 9. USA/Indiana12.83/2013 | M | S | --- | S | S   | W | Y | C | G     | G | L | E | A     | S     | G     | V     | H | G     | I     | F | L     | S | Y     | I     | D | A | G | G | F | E | I | G | I | S | E | F | D | D | S | G | Y | L | Y | L | H | A | N | G | H | N | A | I | A | L | R | I | C | F | F | D | K | L | G | P | V | --- | D   | V | T | G | R | N | C | L | F | N | K | A | I | F | A | Y | M | D | G | K | I | V  | V |   |   |
| 10. Iowa106              | M | S | --- | S | S   | W | Y | C | G     | G | L | E | A     | S     | G     | V     | H | G     | I     | F | L     | S | Y     | I     | D | A | G | G | F | E | I | G | I | S | E | F | D | D | S | G | Y | L | Y | L | H | A | N | G | H | N | A | I | A | L | R | I | C | F | F | D | K | L | G | P | V | --- | D   | V | T | G | R | N | C | L | F | N | K | A | I | F | A | Y | M | D | G | K | I | V  | V |   |   |
| 11. L00719               | M | S | --- | S | S   | W | Y | C | G     | G | L | E | A     | S     | G     | V     | H | G     | I     | F | L     | S | Y     | I     | D | A | G | G | F | E | I | G | I | S | E | F | D | D | S | G | Y | L | Y | L | H | A | N | G | H | N | A | I | A | L | R | I | C | F | F | D | K | L | G | P | V | --- | D   | V | T | G | R | N | C | L | F | N | K | A | I | F | A | Y | M | D | G | K | I | V  | V |   |   |
| 12. CV777                | M | S | --- | S | S   | W | Y | C | G     | G | L | E | A     | S     | G     | V     | H | G     | I     | F | L     | S | Y     | I     | D | A | G | G | F | E | I | G | I | S | E | F | D | D | S | G | Y | L | Y | L | H | A | N | G | H | N | A | I | A | L | R | I | C | F | F | D | K | L | G | P | V | --- | D   | V | T | G | R | N | C | L | F | N | K | A | I | F | A | Y | M | D | G | K | I | V  | V |   |   |
| 13. DR13 vir             | M | S | --- | S | S   | W | Y | C | G     | G | L | E | A     | S     | G     | V     | H | G     | I     | F | L     | S | Y     | I     | D | A | G | G | F | E | I | G | I | S | E | F | D | D | S | G | Y | L | Y | L | H | A | N | G | H | N | A | I | A | L | R | I | C | F | F | D | K | L | G | P | V | --- | D   | V | T | G | R | N | C | L | F | N | K | A | I | F | A | Y | L | D | G | K | I | V  | V |   |   |
| 14. 83P5-P100            | M | S | --- | S | S   | W | Y | C | G     | G | L | E | A     | S     | G     | V     | H | G     | I     | F | L     | S | Y     | I     | D | A | G | G | F | E | I | G | I | S | E | F | D | D | S | G | Y | L | Y | L | H | A | N | G | H | N | S | A | I | A | L | R | I | C | F | F | D | K | L | G | P | V   | --- | D | V | T | G | R | N | C | L | F | N | K | A | I | F | A | - | L | D | G | K | I  | V | V |   |

Fig S10.

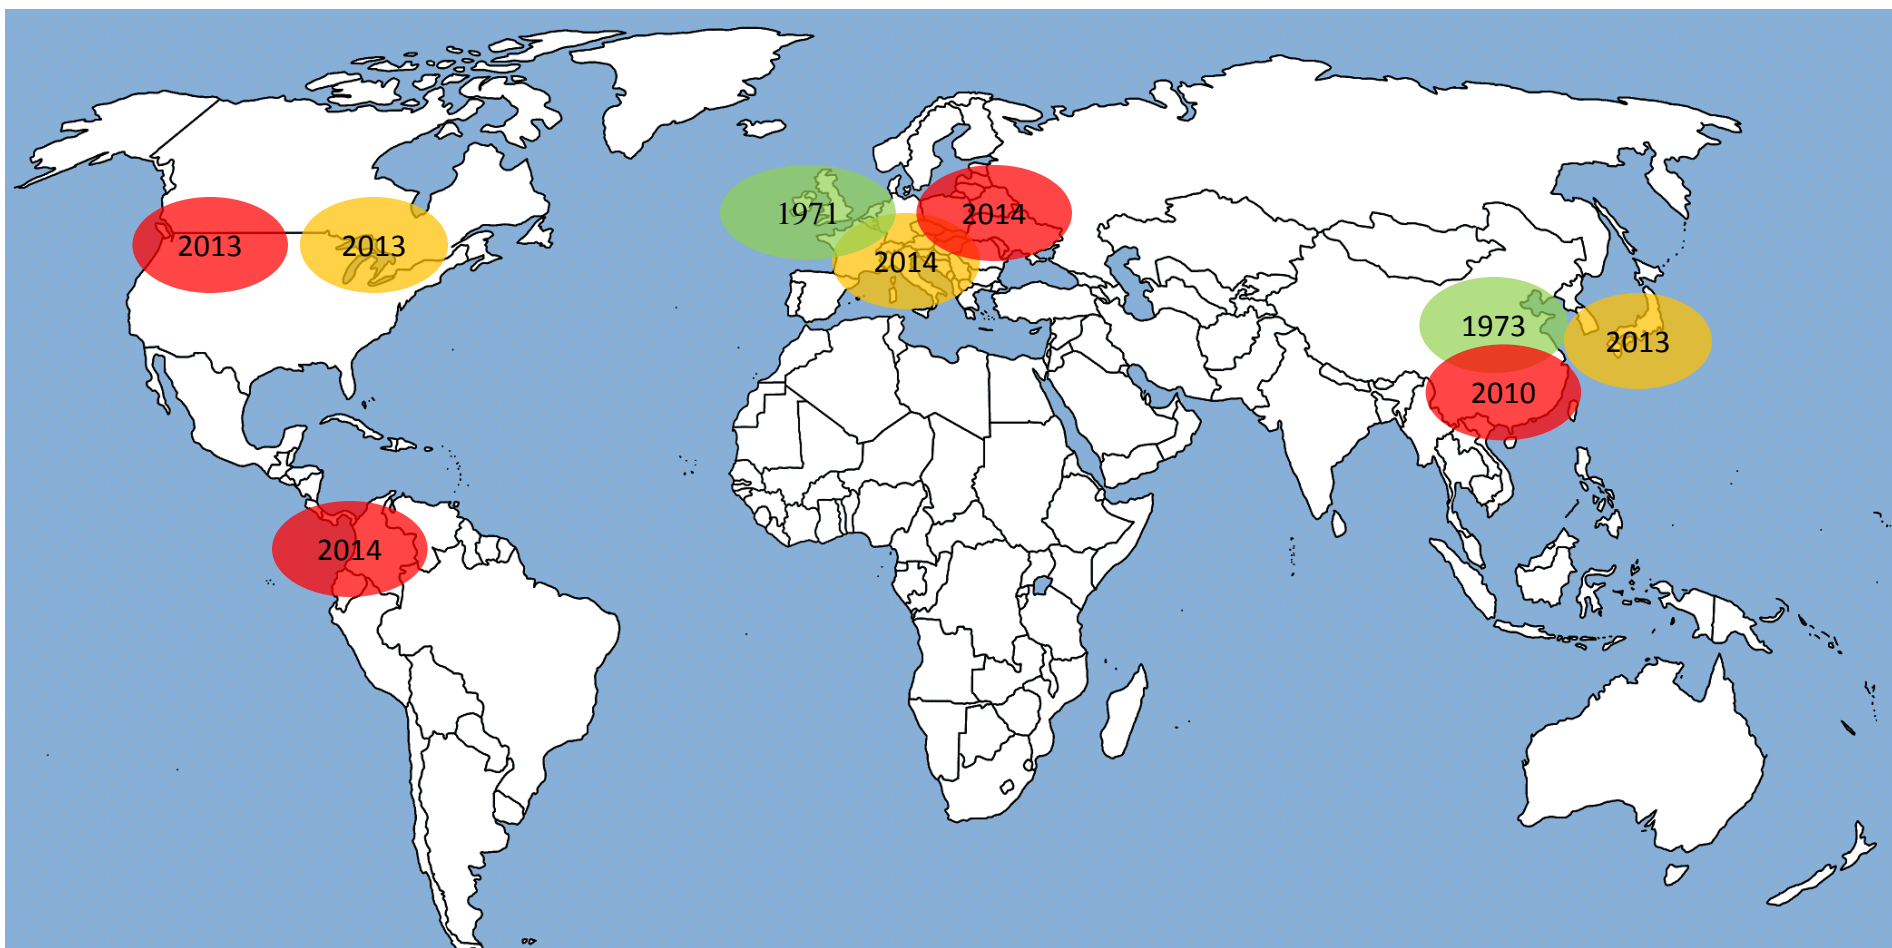

Supplement: mmc1.pdf [file mmc1.pdf]
